# Supplementary material for: FGIN-1-27 Inhibits Melanogenesis by Regulating Protein Kinase A/cAMP-Responsive Element-Binding, Protein Kinase C-β, and Mitogen-Activated Protein Kinase Pathways
Source: PubMed Central journal article supplement (PMC7775666; doi:10.3389/fphar.2020.602889), 2020-12-03
Supplement: datasheet1.pdf [file datasheet1.pdf]

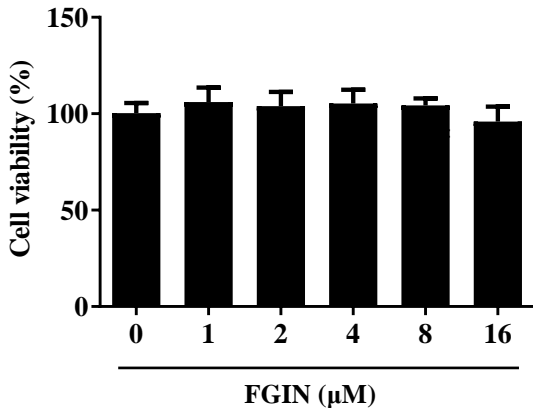

**Figure S1.** Effect of FGIN-1-27 (FGIN) on cell viability in human melanocytes. After incubation of with various concentrations (1-16  $\mu\text{M}$ ) of FGIN-1-27 for 48 h, cell viability was determined using MTT assay. Data are expressed as the mean  $\pm$  SD (n=3).

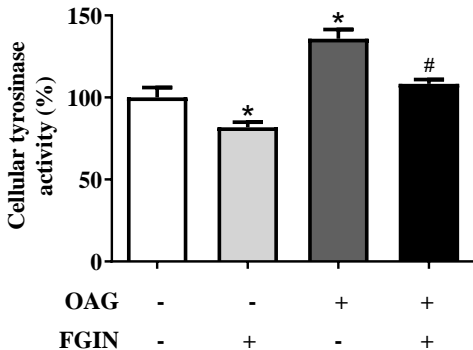

**Figure S2.** Effect of FGIN-1-27 (FGIN) on the tyrosinase activity in human melanocytes. Human melanocytes were treated with FGIN-1-27 (4 $\mu$ M) in the presence or absence of OAG (200  $\mu$ M) for 12 h. Cellular tyrosinase activity was determined by L-DOPA oxization as described in methods. Data are expressed as the mean  $\pm$  SD (n=3). \*p<0.05 versus non-treated cells. #p<0.05 versus OAG-treated cells.
