# Supplementary material for: FGIN-1-27 Inhibits Melanogenesis by Regulating Protein Kinase A/cAMP-Responsive Element-Binding, Protein Kinase C-β, and Mitogen-Activated Protein Kinase Pathways
Source: PubMed Central journal article supplement (PMC7775666; doi:10.3389/fphar.2020.602889), 2020-12-03
Supplement: datasheet2.pdf [file datasheet2.pdf]

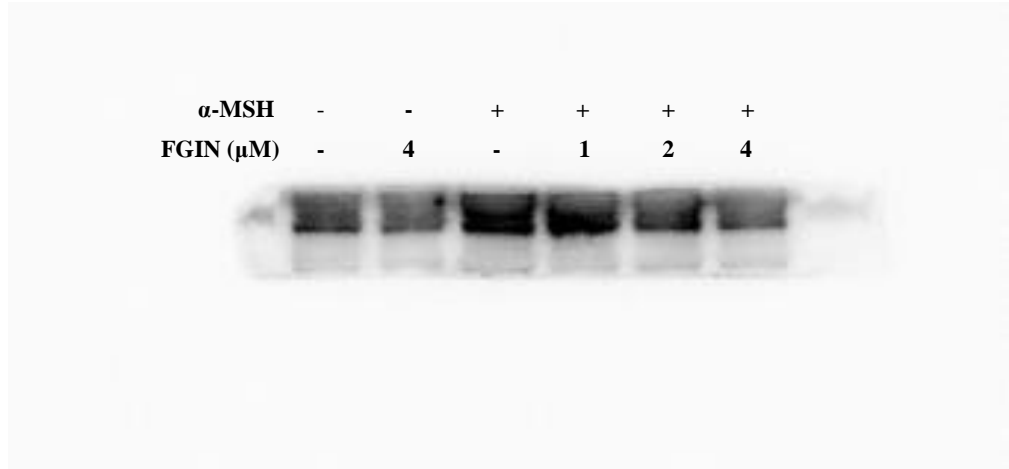

Figure 2A Tyrosinase

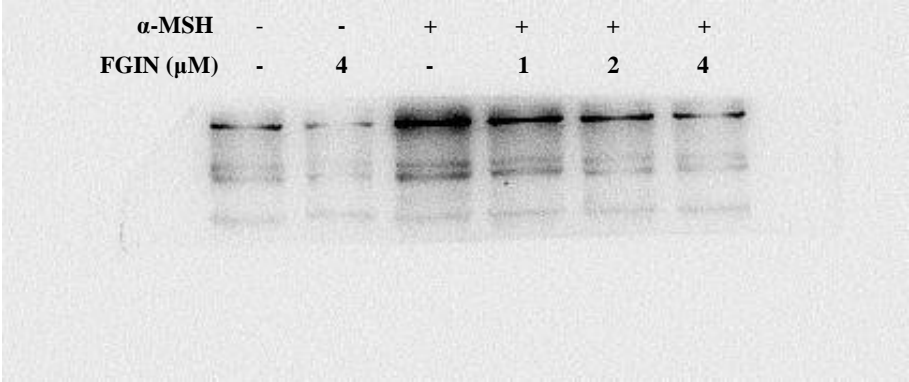

Figure 2A TRP-1

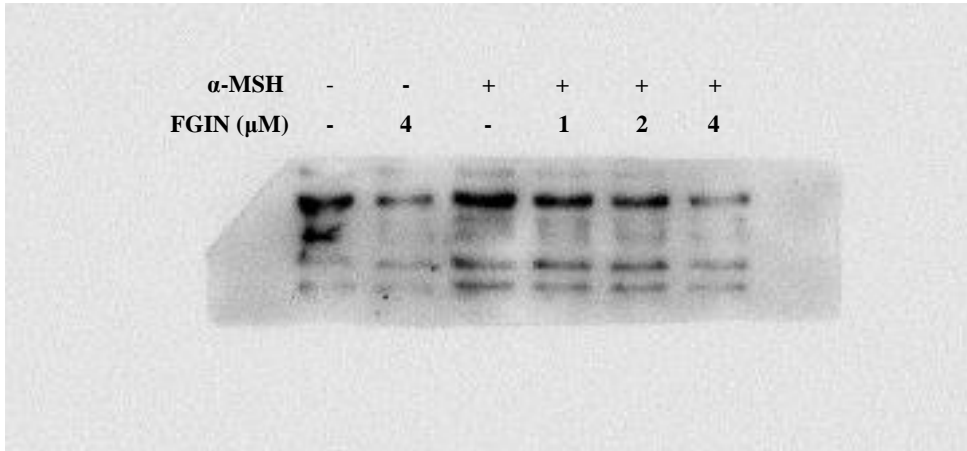

Figure 2A TRP-2

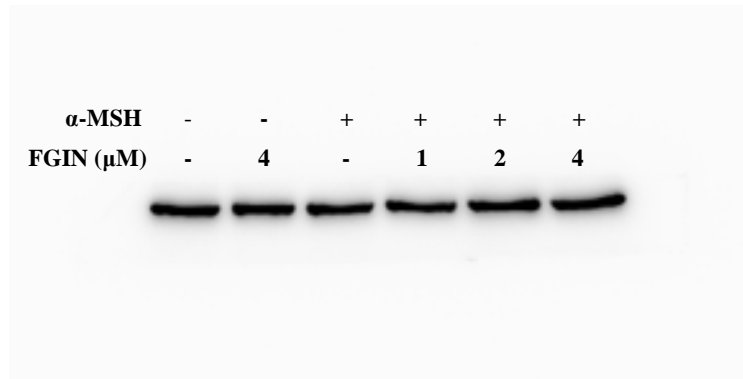

Figure 2A  $\beta$ -actin

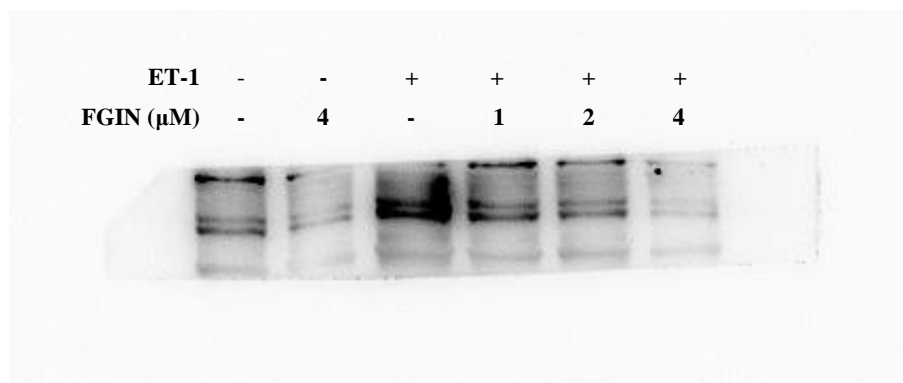

Figure 2B Tyrosinase

|                                        |   |   |   |   |   |   |
|----------------------------------------|---|---|---|---|---|---|
| <b>ET-1</b>                            | - | - | + | + | + | + |
| <b>FGIN (<math>\mu\text{M}</math>)</b> | - | 4 | - | 1 | 2 | 4 |

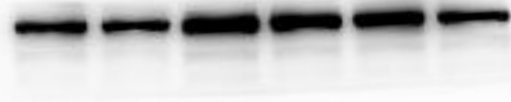

Figure 2B TRP-1

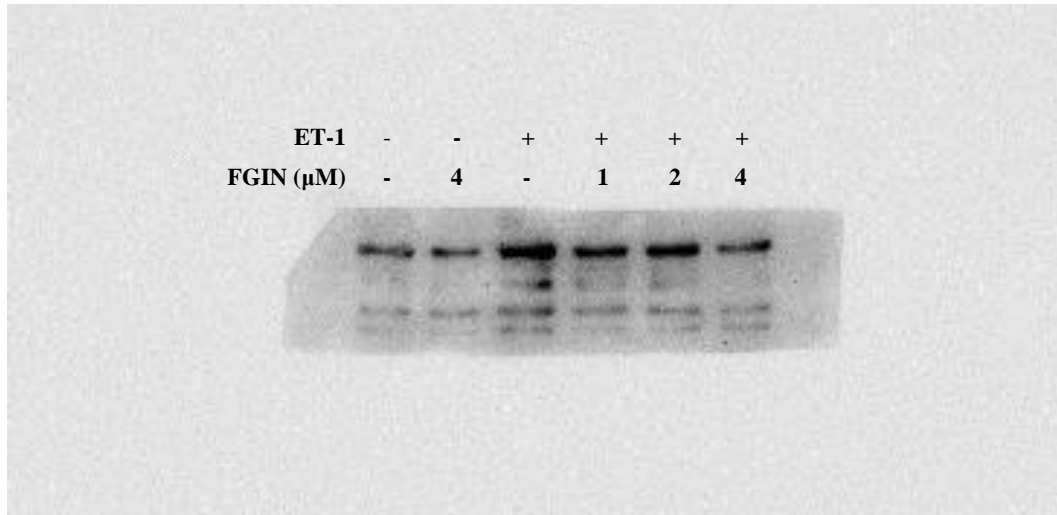

Figure 2B TRP-2

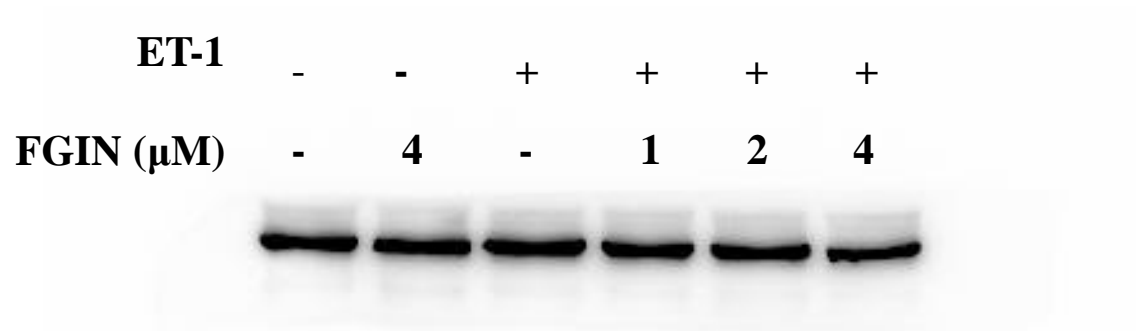

Figure 2B  $\beta$ -actin



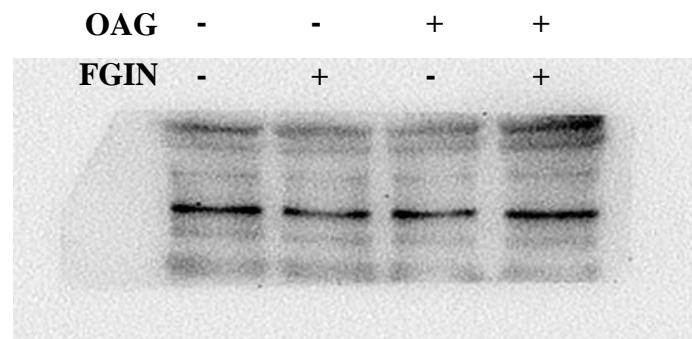

Fig. 2d Tyrosinase

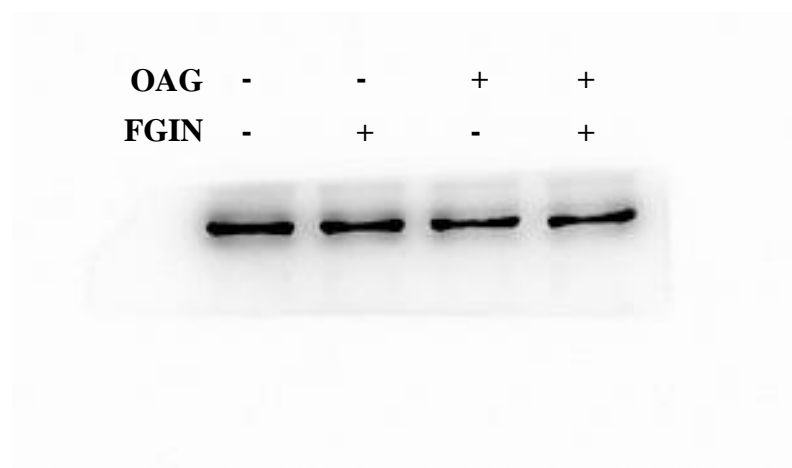

Fig. 2d  $\beta$ -actin

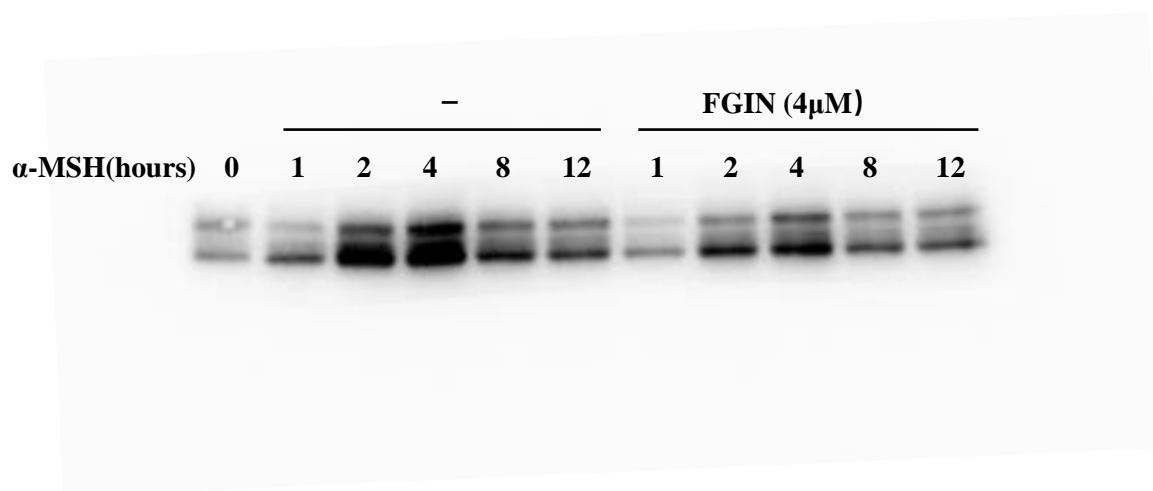

Figure 3B MITF

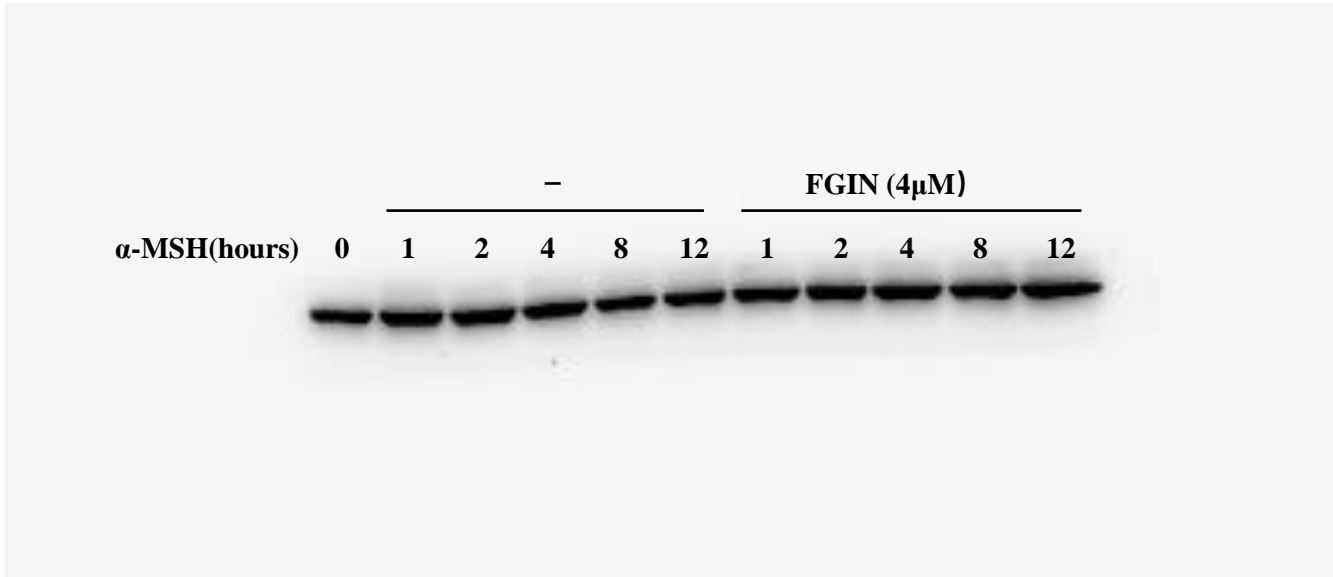

Figure 3B  $\beta$ -actin

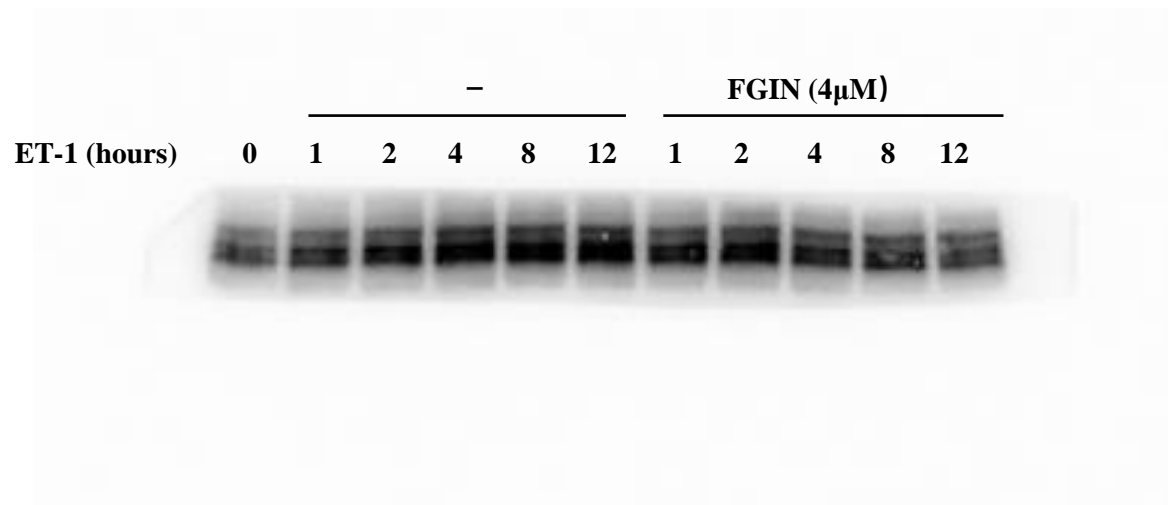

Figure 3C MITF

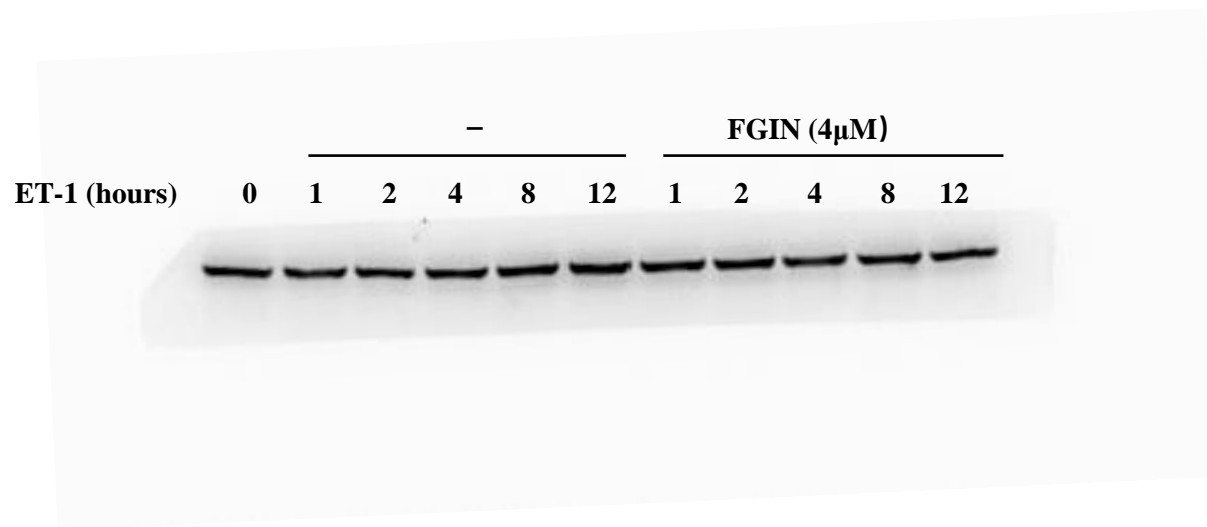

Figure 3C  $\beta$ -actin

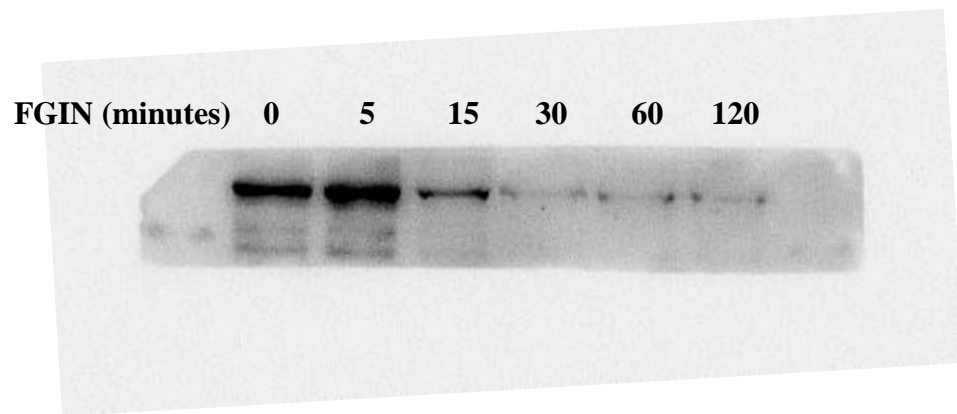

Figure 4 PKC- $\beta$

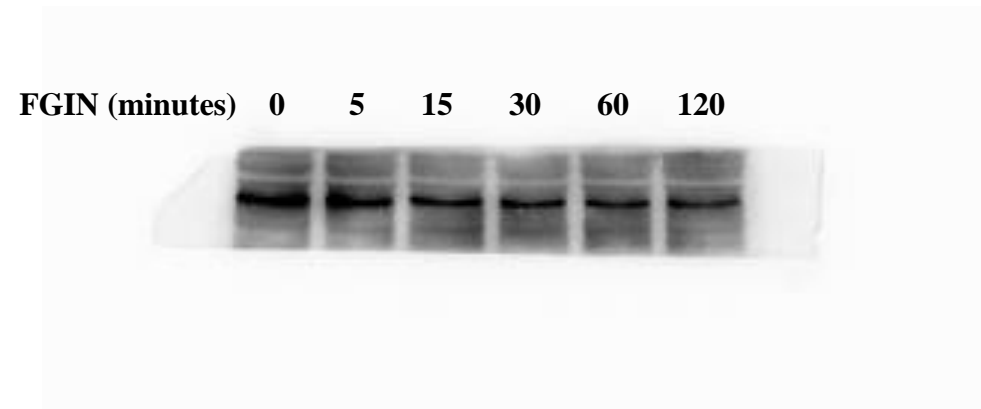

Figure 4 p-PKA cat



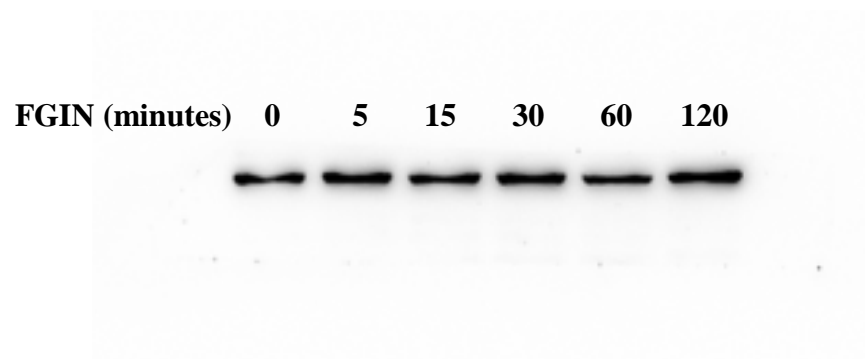

Figure 4 PKA cat

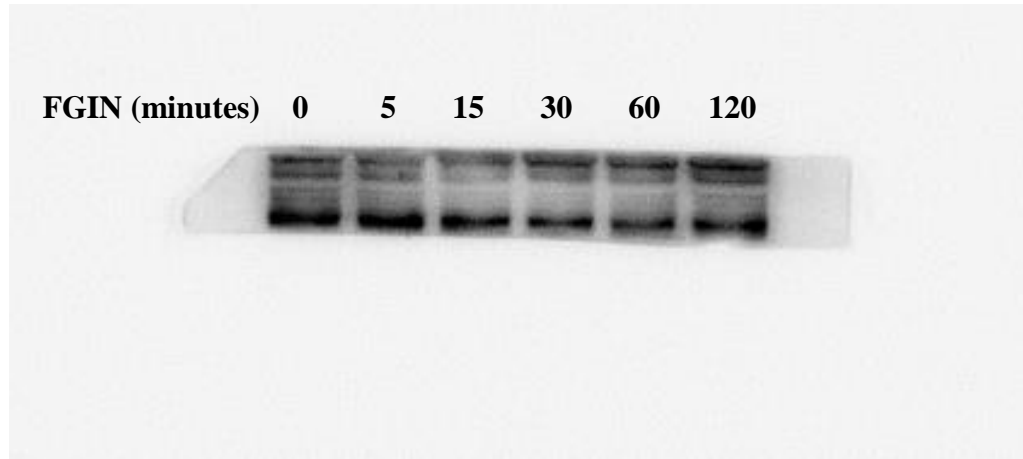

Figure 4 p-CREB

**FGIN (minutes) 0 5 15 30 60 120**

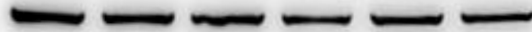

Figure 4 CREB

**FGIN (minutes) 0 5 15 30 60 120**

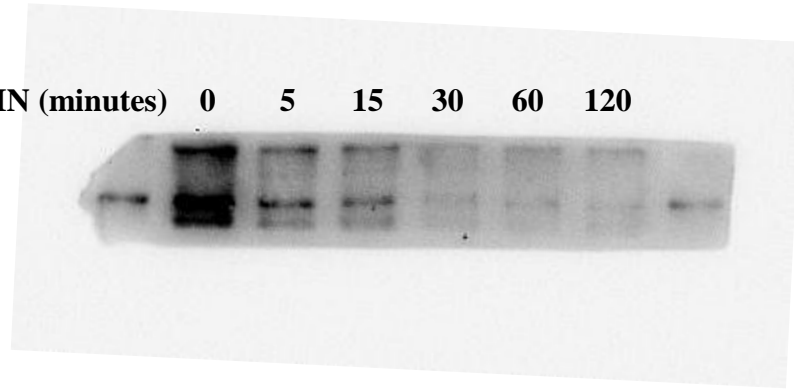

Figure 4 p-p38

**FGIN (minutes) 0 5 15 30 60 120**

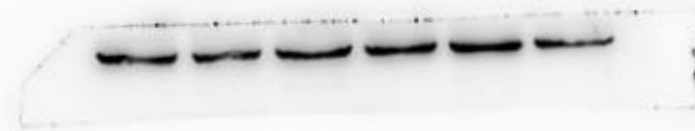

Figure 4 p38

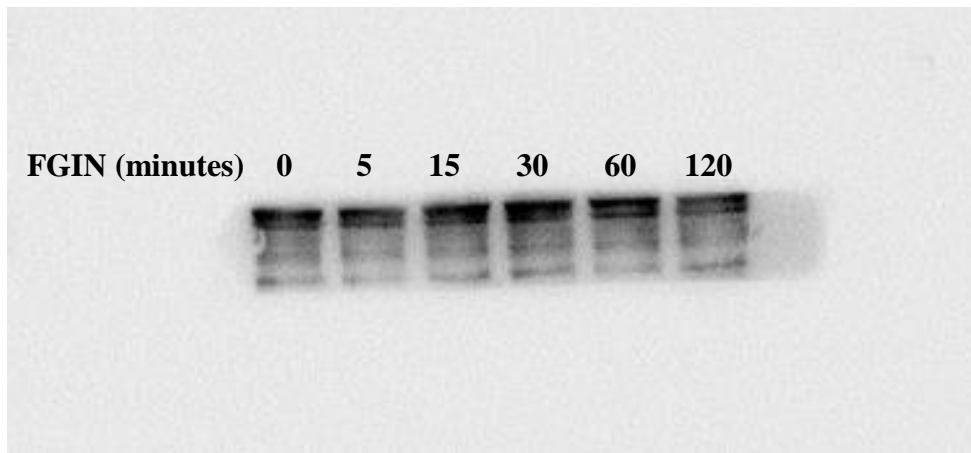

Figure 4 p-JNK

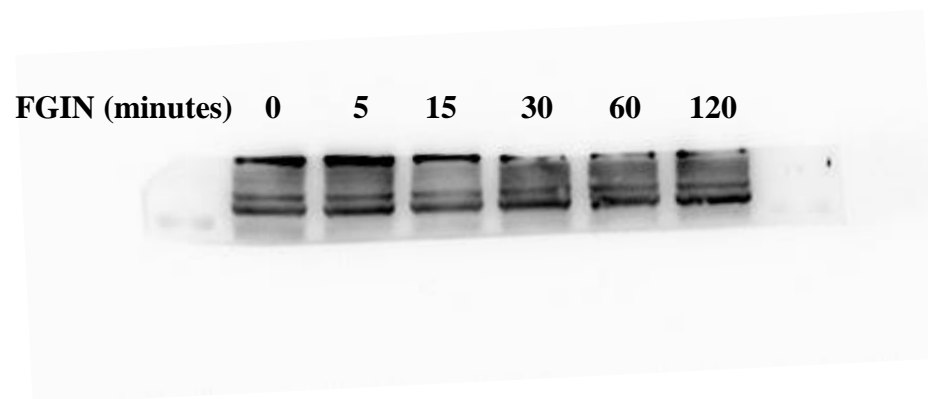

Figure 4 JNK

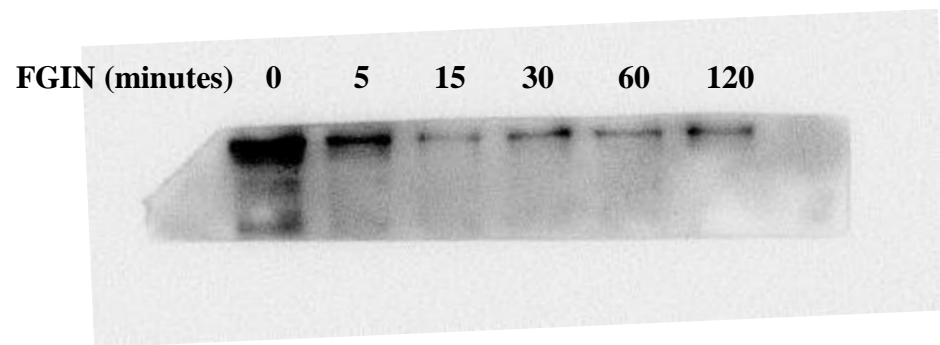

Figure 4 p-ERK



**FGIN (minutes) 0 5 15 30 60 120**

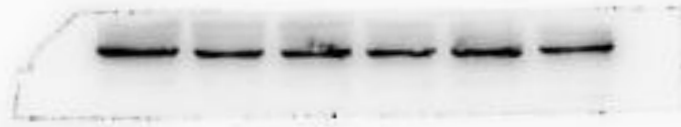

Figure 4 ERK

**FGIN (minutes) 0 5 15 30 60 120**

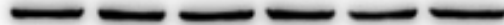

Figure 4  $\beta$ -actin

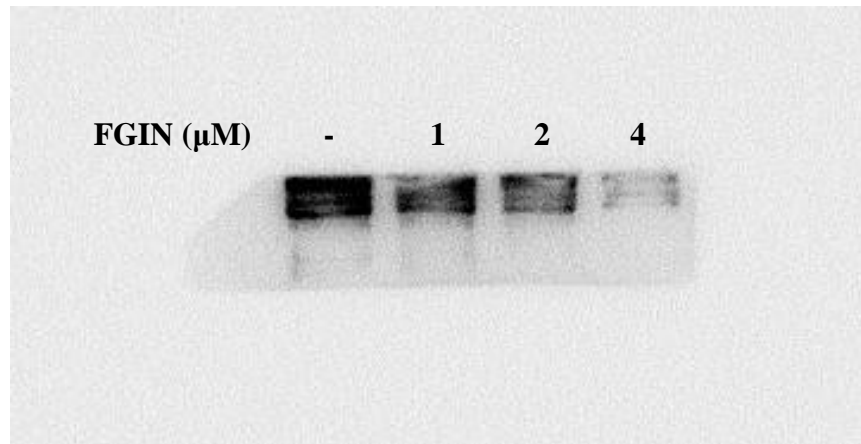

Figure 5B Tyrosinase

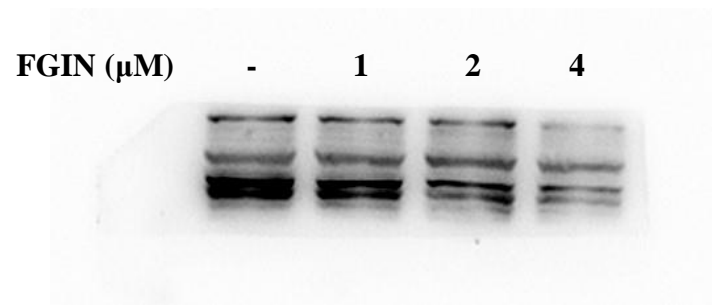

Figure 5B TRP-1

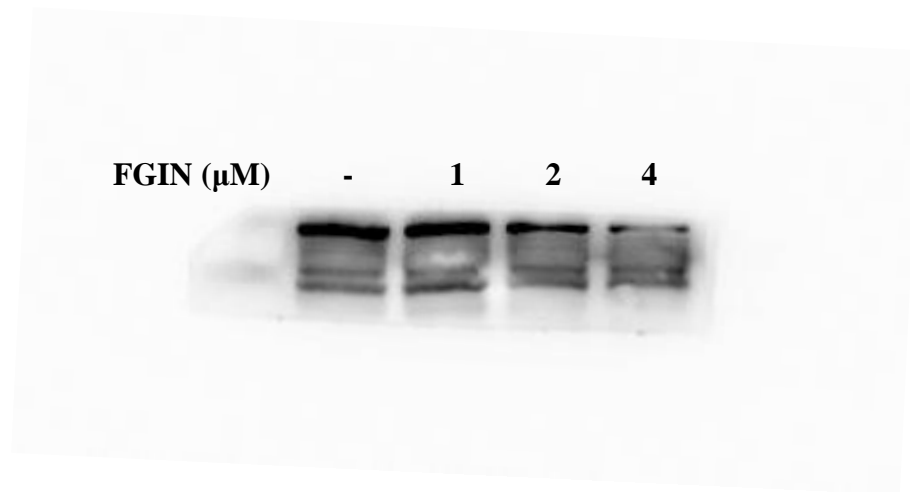

Figure 5B TRP-2

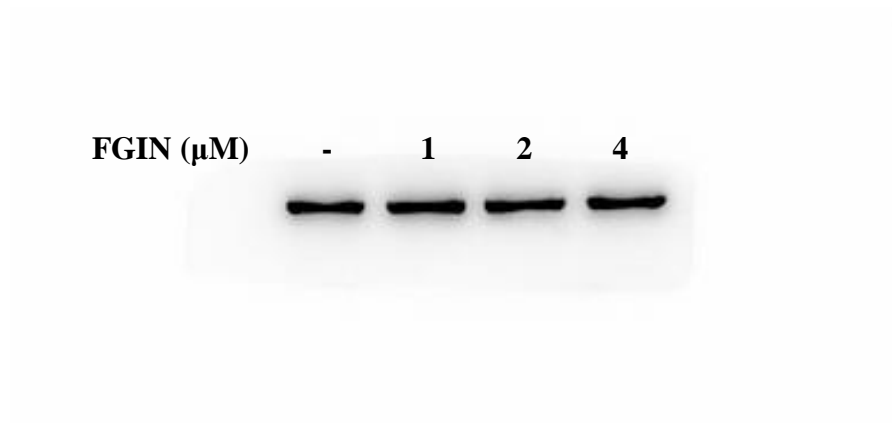

Figure 5B  $\beta$ -actin

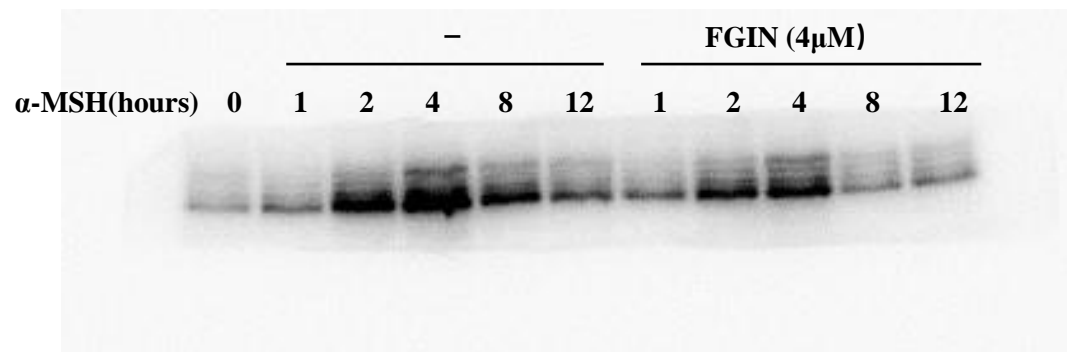

Figure 5C MITF

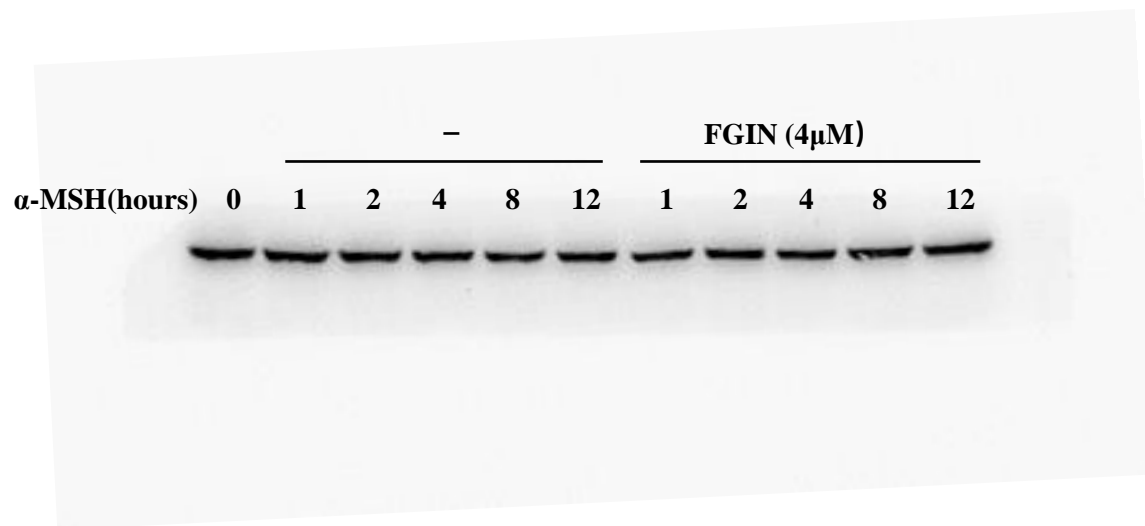

Fig. 5c  $\beta$ -actin



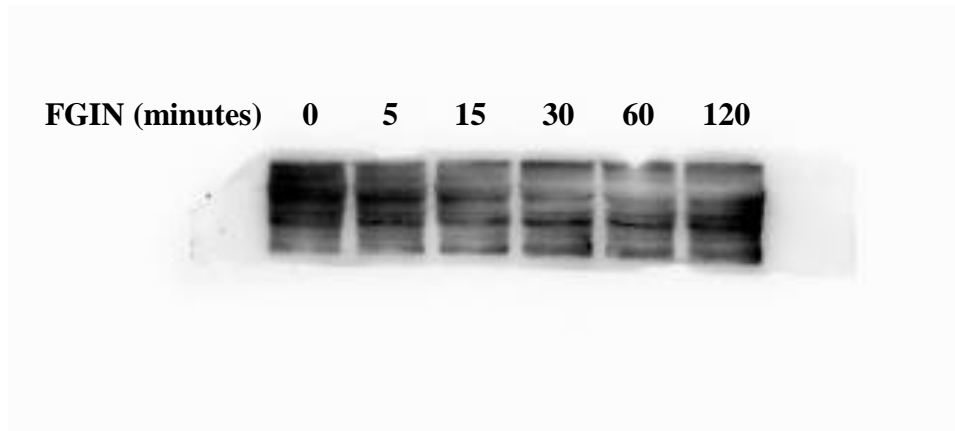

Figure 5D PKC- $\beta$

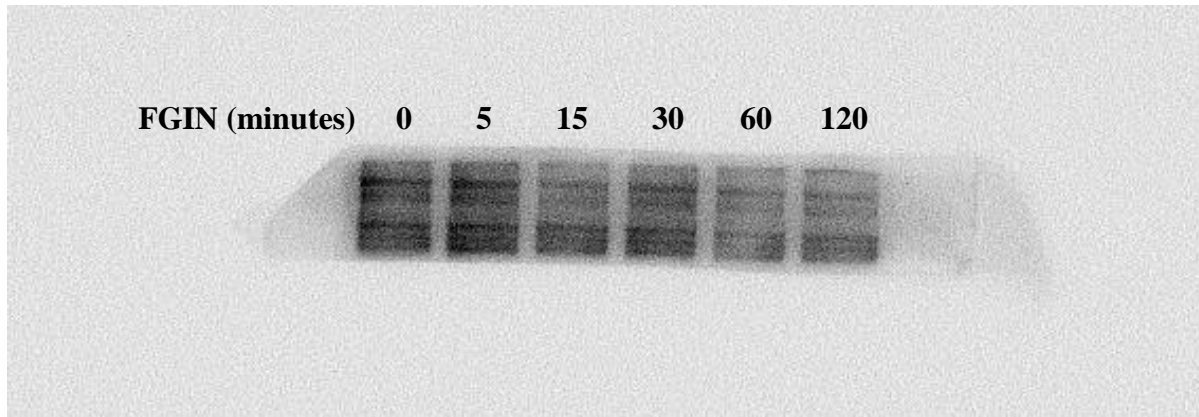

Figure 5d p-PKA cat

**FGIN (minutes) 0 5 15 30 60 120**

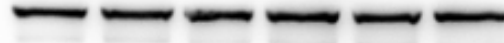

Figure 5D PKA cat

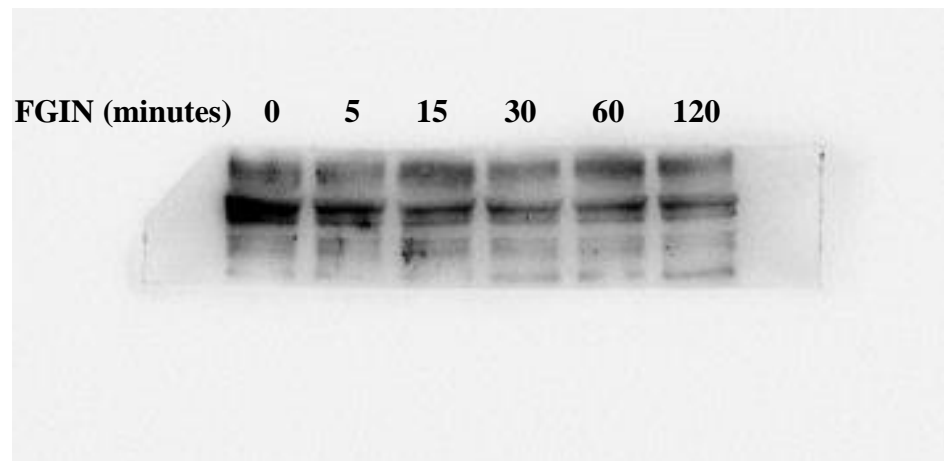

Figure 5D p-CREB

**FGIN (minutes) 0 5 15 30 60 120**

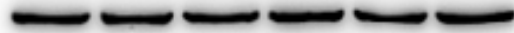

Figure 5D CREB

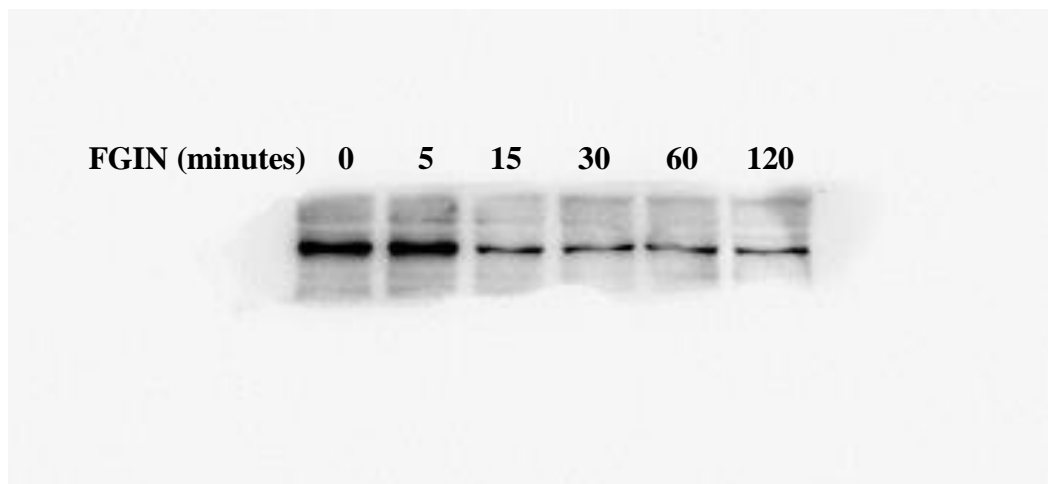

Figure 5D p-p38

**FGIN (minutes) 0 5 15 30 60 120**

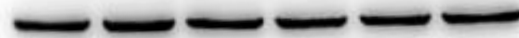

Figure 5D p38

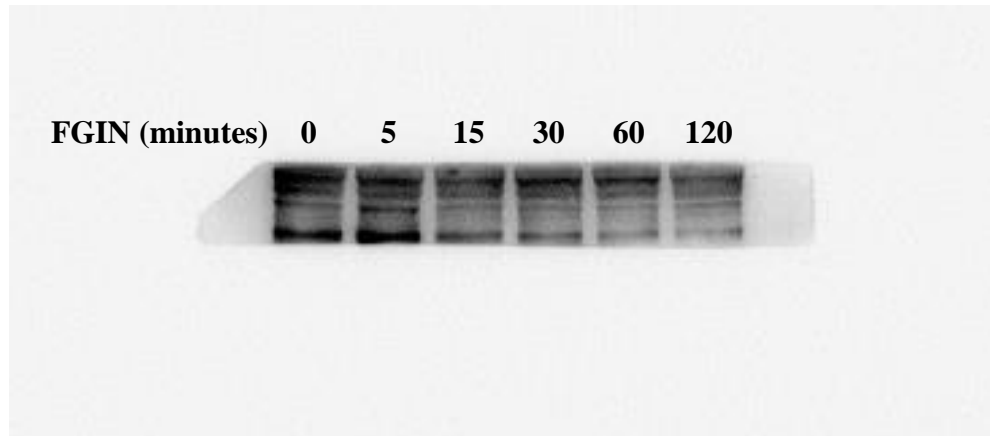

Figure 5D p-ERK



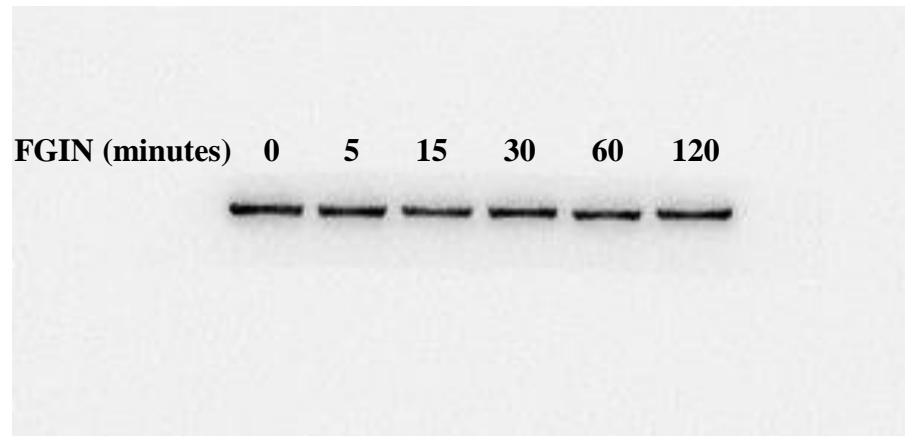

Figure 5D ERK

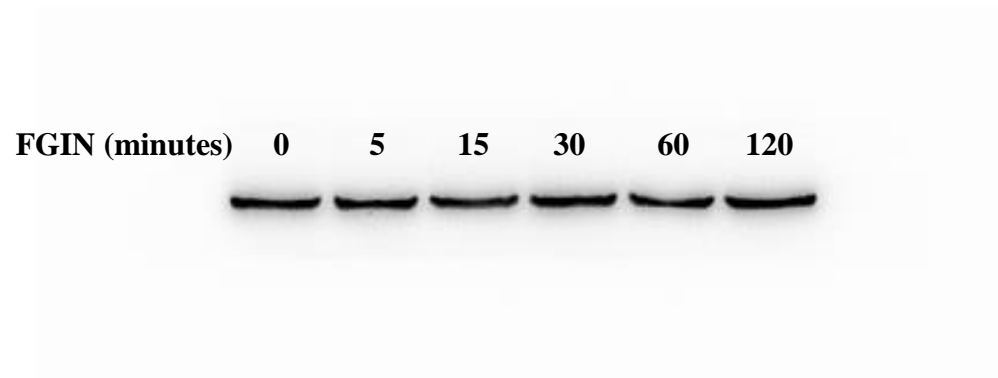

Figure 5D  $\beta$ -actin
